# Supplementary material
Source: PubMed Central journal article supplement (PMC3039481)
Supplement: NIHMS265769-supplement-1.pdf [file NIHMS265769-supplement-1.pdf]

- Centers for Medicare and Medicaid Services (CMS). 2009. "Roadmap for Implementing Value Driven Healthcare in the Traditional Medicare Fee-for-Service Program" [accessed March 4, 2010]. Available at [https://www.cms.gov/QualityInitiativesGenInfo/downloads/VBPRoadmap\\_OEA\\_1-16\\_508.pdf](https://www.cms.gov/QualityInitiativesGenInfo/downloads/VBPRoadmap_OEA_1-16_508.pdf)
- Glickman, S. W., F. Ou, E. R. DeLong, M. T. Roe, B. L. Lytle, J. Mulgund, J. S. Rumsfeld, W. B. Gibler, E. M. Ohman, K. A. Schulman, and E. D. Peterson. 2007. "Pay for Performance, Quality of Care and Outcomes in Acute Myocardial Infarction." *Journal of the American Medical Association* 297 (21): 2373–80.
- Horwitz, J., and A. Nichols. 2007. What Do Non-Profits Maximize? Non-Profit Hospital Service Provision and Market Ownership Mix. NBER Working Paper 13246.
- Institute of Medicine. 2007. *Rewarding Provider Performance*. Washington, DC: National Academy Press.
- Jha, A. 2005. "Care in U.S. Hospitals—The Hospital Quality Alliance Program." *New England Journal of Medicine* 353 (3): 265–74.
- Lindenauer, P. K., D. Remus, S. Roman, M. B. Rothberg, E. M. Benjamin, A. Ma, and D. W. Bratzler. 2007. "Public Reporting and Pay for Performance in Hospital Quality Improvement." *New England Journal of Medicine* 356 (5): 486–96.
- Mullen, K. J., R. G. Frank, and M. B. Rosenthal. 2009. Can You Get What You Pay for? Pay-for-Performance and the Quality of Healthcare Providers. NBER Working Paper 14886.
- Petersen, L. A., L. D. Woodard, T. Urech, C. Daw, and S. Sookanan. 2006. "Does Pay-for-Performance Improve the Quality of Health Care?" *Annals of Internal Medicine* 145 (4): 265–72.
- Rosenthal, M. B., R. G. Frank, Z. Li, and A. M. Epstein. 2005. "Early Experience with Pay-for-Performance from Concept to Practice." *Journal of the American Medical Association* 294 (14): 1788–93.
- Ryan, A. 2009. "Effects of the Premier Hospital Quality Incentive Demonstration on Medicare Patient Mortality and Cost." *Health Services Research* 44 (3): 821–42.
- . 2010. "Has Pay-for-Performance Decreased Access for Minority Patients?" *Health Services Research* 45 (1): 6–23.

## SUPPORTING INFORMATION

Additional supporting information may be found in the online version of this article:

Appendix SA1: Author Matrix.

Table SA1: Pay-for-Performance Participation and Hospital Process Compliance, Voluntary Hospital Compare Reporters: Fiscal Years 2003–2005.

Table SA2: Pay-for-Performance Participation and Hospital Process Compliance among Early Reporters, Fiscal Years 2003–2005, Individual Measure Regression Coefficients.

Please note: Wiley-Blackwell is not responsible for the content or functionality of any supporting materials supplied by the authors. Any queries (other than missing material) should be directed to the corresponding author for the article.
